# Supplementary material for: A Si(111)-(7 × 7) surface as a natural substrate for identical cluster catalysts
Source: Royal Society of Chemistry journal article supplement (doi:10.1039/d3ta02554c), 2023-01-01
Supplement: d3ta02554c1.pdf [file d3ta02554c1.pdf]

## Supporting Information

### **Si(111)–(7×7) surface as a natural substrate for identical clusters catalysts**

Yu Guo,<sup>a</sup> Yanyan Zhao,<sup>a</sup> Wei Pei,<sup>b</sup> Si Zhou,<sup>\*,a</sup> Jijun Zhao<sup>\*,a</sup>

*<sup>a</sup>State Key Laboratory of Structural Analysis for Industrial Equipment, Dalian University of  
Technology, Dalian, 116024, China*

*<sup>b</sup>College of Physics Science and Technology, Yangzhou University, Jiangsu 225009, China*

---

\*Corresponding authors. Email: sizhou@dlut.edu.cn; zhaojj@dlut.edu.cn

## Table of contents

- S1. Electronic structures of Si(111)-(7×7) system
- S2. Electronic structures of identical metal clusters on Si(111)-(7×7) surface
- S3. Binding energy and charge transfer between metal cluster and Si(111)-(7×7)
- S4. *d* orbital center ( $\varepsilon_d$ ) of the supported clusters
- S5. Free energy calculation
- S6. Schematic illustration for CO<sub>2</sub> reduction reaction
- S7. Free energy diagrams of CO<sub>2</sub> reduction
- S8. CO<sub>2</sub> reduction of Pt<sub>6</sub> clusters on Si(111)-(7×7) surface
- S9. Kinetic process of reaction channels on Pd<sub>6</sub>@Si(111)-(7×7)
- S10. H<sub>2</sub>O decomposition on Pd<sub>6</sub>@Si(111)-(7×7) surface
- S11. Gibbs free energy of formation for C<sub>1</sub> products
- S12. Gibbs free energy of formation for C<sub>2</sub> products
- S13. Gibbs free energy of formation for C<sub>3</sub> products
- S14. Gibbs free energy of formation for C<sub>4</sub> products

### S1. Electronic structures of Si(111)-(7×7) system

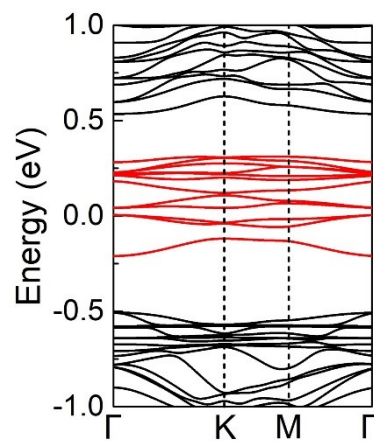

Fig. S1. The calculated band structure of the Si(111)-(7×7) surface. Here, the bands originating from adatoms are shown with red colors. The energy zero represents the Fermi level.

## S2. Electronic structures of identical metal clusters on Si(111)-(7x7) surface

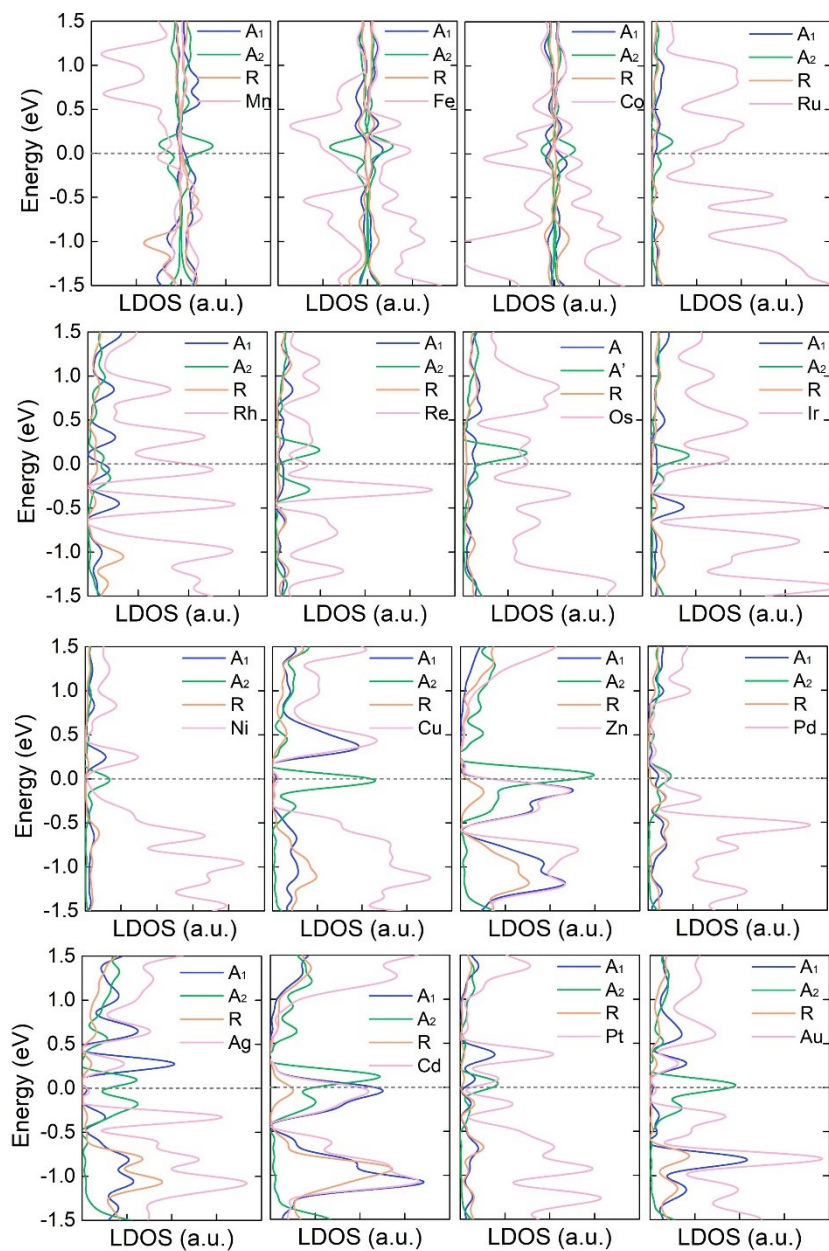

Fig. S2. The local density of states (LDOS) for identical metal clusters on Si(111)-(7x7) surface.

### S3. Binding energy and charge transfer between metal cluster and Si(111)-(7×7)

Table S1. Binding energy ( $E_b$ ) and charge transfer (CT) between metal cluster and Si(111)-(7×7) template

| Cluster | $E_b$ (eV/atom) | CT ( $e$ ) |
|---------|-----------------|------------|
| Mn      | -0.51           | 0.51       |
| Re      | -1.58           | 0.62       |
| Fe      | -0.32           | 0.51       |
| Ru      | -1.94           | 0.69       |
| Os      | -3.08           | 1.11       |
| Co      | 0.58            | 0.27       |
| Rh      | -2.18           | 0.76       |
| Ir      | -3.12           | 1.21       |
| Ni      | 0.22            | 0.33       |
| Pd      | -1.21           | 0.58       |
| Pt      | -2.48           | 1.08       |
| Cu      | 1.34            | 0.01       |
| Ag      | 1.17            | 0.05       |
| Au      | 1.43            | 0.01       |
| Zn      | 0.61            | 0.24       |
| Cd      | 0.71            | 0.23       |

#### S4. *d* orbital center ( $\epsilon_d$ ) of the supported clusters

Table S2. *d* orbital center ( $\epsilon_d$ ) of the supported clusters.

| Cluster | $\epsilon_d$ (eV) |
|---------|-------------------|
| Ni      | -2.85             |
| Pd      | -2.73             |
| Pt      | -1.59             |
| Cu      | -2.38             |
| Ag      | -3.91             |
| Au      | -3.53             |
| Zn      | -6.74             |
| Cd      | -8.34             |

## S5. Free energy calculation

Table S3. Zero-point energy (ZPE) and entropic correction ( $TS$ ) at  $T = 298.15$  K for the molecules and intermediate species involved in  $\text{CO}_2$  reduction to  $\text{C}_1$  products. The ZPE and  $TS$  values of reaction intermediates adsorbed on  $\text{Pd}_6@\text{Si}(111)-(7 \times 7)$  are presented and used throughout our calculations.

| Species                  | ZPE (eV) | $TS$ (eV) | ZPE- $TS$ (eV) |
|--------------------------|----------|-----------|----------------|
| $\text{CO}_2^*$          | 0.30     | 0.12      | 0.18           |
| $\text{COOH}^*$          | 0.62     | 0.20      | 0.43           |
| $\text{HCOOH}^*$         | 0.91     | 0.15      | 0.76           |
| $\text{CO}^*$            | 0.19     | 0.05      | 0.14           |
| $\text{HCO}^*$           | 0.45     | 0.16      | 0.29           |
| $\text{HCOH}^*$          | 0.79     | 0.10      | 0.69           |
| $\text{H}_2\text{COH}^*$ | 1.09     | 0.25      | 0.84           |
| $\text{CH}_3\text{OH}^*$ | 1.37     | 0.21      | 1.16           |
| $\text{CH}_2^*$          | 0.65     | 0.09      | 0.56           |
| $\text{CH}_3^*$          | 0.93     | 0.13      | 0.80           |
| $\text{CH}_4^*$          | 1.20     | 0.20      | 0.99           |
| $\text{CH}_2\text{O}^*$  | 0.71     | 0.17      | 0.53           |

Table S4. Zero-point energy (ZPE) and entropic correction ( $TS$ ) at  $T = 298.15$  K for the molecules and intermediate species involved in  $\text{CO}_2$  reduction to  $\text{C}_2$  products. The ZPE and  $TS$  values of reaction intermediates adsorbed on  $\text{Pd}_6@Si(111)-(7 \times 7)$  are presented and used throughout our calculations.

| Species                             | ZPE (eV) | $TS$ (eV) | ZPE- $TS$ (eV) |
|-------------------------------------|----------|-----------|----------------|
| $\text{CO}_2, \text{CO}_2^*$        | 0.60     | 0.24      | 0.36           |
| $\text{CHO}-\text{CHO}^*$           | 0.92     | 0.26      | 0.66           |
| $\text{CHO}-\text{CHOH}^*$          | 1.31     | 0.25      | 1.06           |
| $\text{CHO}-\text{CH}^*$            | 0.93     | 0.17      | 0.76           |
| $\text{CHO}-\text{CH}_2^*$          | 1.19     | 0.13      | 1.06           |
| $\text{CHOH}-\text{CH}_2^*$         | 1.53     | 0.18      | 1.35           |
| $\text{CH}-\text{CH}_2^*$           | 1.07     | 0.17      | 0.90           |
| $\text{C}_2\text{H}_4^*$            | 1.37     | 0.22      | 1.15           |
| $\text{CHO}-\text{CH}_3^*$          | 1.49     | 0.28      | 1.22           |
| $\text{CH}_2\text{O}-\text{CH}_3^*$ | 1.79     | 0.19      | 1.60           |
| $\text{C}_2\text{H}_5\text{OH}^*$   | 2.15     | 0.33      | 1.81           |



Table S5. Zero-point energy (ZPE) and entropic correction ( $TS$ ) at  $T = 298.15$  K for the molecules and intermediate species involved in  $\text{CO}_2$  reduction to  $\text{C}_3$  products. The ZPE and  $TS$  values of reaction intermediates adsorbed on  $\text{Pd}_6@Si(111)-(7 \times 7)$  are presented and used throughout our calculations.

| Species                                               | ZPE (eV) | $TS$ (eV) | ZPE- $TS$ (eV) |
|-------------------------------------------------------|----------|-----------|----------------|
| CHO-CH-CHO*                                           | 1.44     | 0.25      | 1.20           |
| CHO-CH-CHOH*                                          | 1.78     | 0.27      | 1.52           |
| CHO-CH-CH*                                            | 1.35     | 0.22      | 1.13           |
| CHO-CH-CH <sub>2</sub> *                              | 1.64     | 0.18      | 1.47           |
| CHOH-CH-CH <sub>2</sub> *                             | 1.99     | 0.32      | 1.67           |
| CHOH-CH <sub>2</sub> -CH <sub>2</sub> *               | 2.25     | 0.27      | 1.99           |
| CHOH-CH <sub>2</sub> -CH <sub>3</sub> *               | 2.58     | 0.24      | 2.33           |
| CH <sub>2</sub> OH-CH <sub>2</sub> -CH <sub>3</sub> * | 2.87     | 0.38      | 2.49           |
| CH-CH-CH <sub>2</sub> *                               | 1.55     | 0.22      | 1.33           |
| CH <sub>2</sub> -CH-CH <sub>2</sub> *                 | 1.85     | 0.17      | 1.68           |
| CH <sub>2</sub> -CH-CH <sub>3</sub> *                 | 2.14     | 0.23      | 1.92           |

Table S6. Zero-point energy (ZPE) and entropic correction ( $TS$ ) at  $T=298.15$  K for the molecules and intermediate species involved in  $\text{CO}_2$  reduction to  $\text{C}_4$  products. The ZPE and  $TS$  values of reaction intermediates adsorbed on  $\text{Pd}_6@Si(111)-(7\times 7)$  are presented and used throughout our calculations.

| Species                                                                | ZPE (eV) | $TS$ (eV) | ZPE- $TS$ (eV) |
|------------------------------------------------------------------------|----------|-----------|----------------|
| CHO-CH-CH-CHO*                                                         | 1.89     | 0.34      | 1.55           |
| CHO-CH-CH-CHOH*                                                        | 2.22     | 0.31      | 1.91           |
| CHO-CH-CH-CH*                                                          | 1.77     | 0.26      | 1.51           |
| CHO-CH-CH-CH <sub>2</sub> *                                            | 2.10     | 0.27      | 1.84           |
| CHOH-CH-CH-CH <sub>2</sub> *                                           | 2.43     | 0.32      | 2.10           |
| CH-CH-CH-CH <sub>2</sub> *                                             | 1.96     | 0.25      | 1.72           |
| CH <sub>2</sub> -CH-CH-CH <sub>2</sub> *                               | 2.28     | 0.27      | 2.01           |
| CH <sub>2</sub> -CH-CH-CH <sub>3</sub> *                               | 2.39     | 0.32      | 2.07           |
| CH <sub>2</sub> -CH-CH <sub>2</sub> -CH <sub>3</sub> *                 | 2.91     | 0.33      | 2.57           |
| CHOH-CH-CH-CH <sub>3</sub> *                                           | 2.72     | 0.39      | 2.33           |
| CH <sub>2</sub> OH-CH-CH-CH <sub>3</sub> *                             | 3.01     | 0.32      | 2.69           |
| CH <sub>2</sub> OH-CH-CH <sub>2</sub> -CH <sub>3</sub> *               | 3.29     | 0.26      | 3.03           |
| CH <sub>2</sub> OH-CH <sub>2</sub> -CH <sub>2</sub> -CH <sub>3</sub> * | 3.63     | 0.42      | 3.21           |

## S6. Schematic illustration for CO<sub>2</sub> reduction reaction

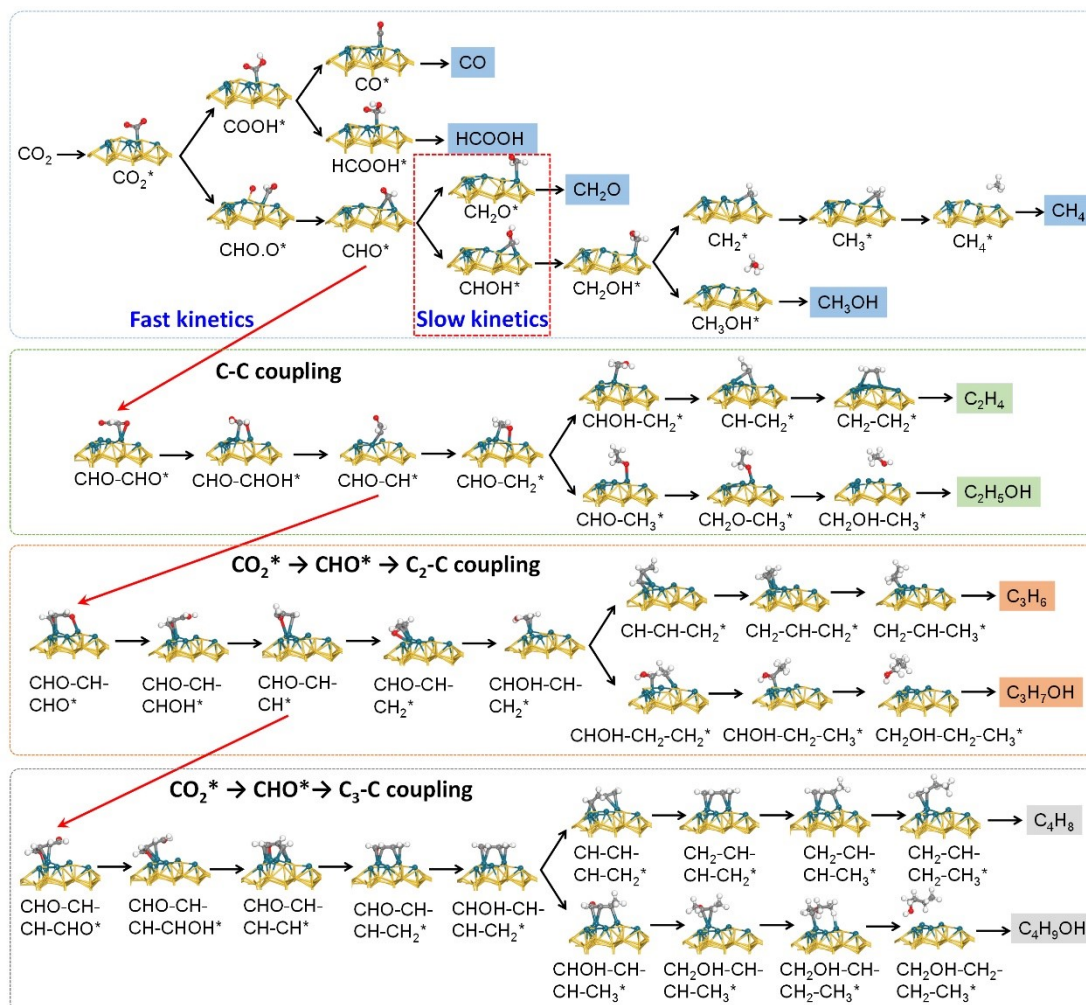

Fig. S3. Schematic illustration of the most efficient pathways for CO<sub>2</sub> reduction toward C<sub>1</sub>–C<sub>4</sub> products on Pd<sub>6</sub>@Si(111)–(7×7). The asterisk (\*) indicates chemisorption of reaction intermediates on the catalyst. The Si, Pd, H, C and O atoms are shown in yellow, green, white, gray and red colors, respectively.

## S7. Free energy diagrams of CO<sub>2</sub> reduction

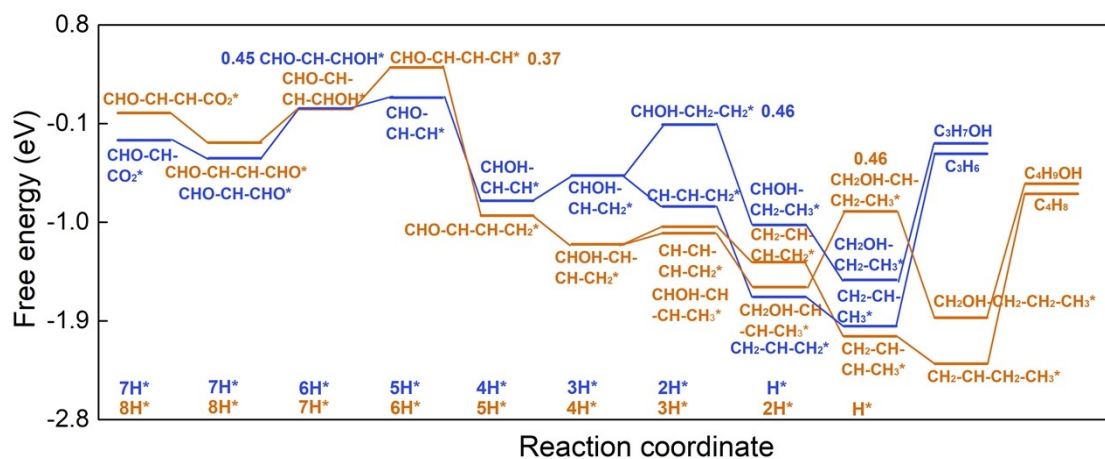

Fig. S4. Free energy diagrams of CO<sub>2</sub> reduction to yield C<sub>3</sub>–C<sub>4</sub> products on Pd<sub>6</sub>@Si(111)–(7×7). The blue and orange numbers indicate the Gibbs free energy of formation for C<sub>3</sub> and C<sub>4</sub> products at the rate-determining step. 0.45, 0.46, 0.37 and 0.46 are the  $\Delta G_{RDS}$  for C<sub>3</sub>H<sub>6</sub>, C<sub>3</sub>H<sub>7</sub>OH, C<sub>4</sub>H<sub>8</sub> and C<sub>4</sub>H<sub>9</sub>OH, respectively.

### S8. CO<sub>2</sub> reduction of Pt<sub>6</sub> clusters on Si(111)-(7×7) surface

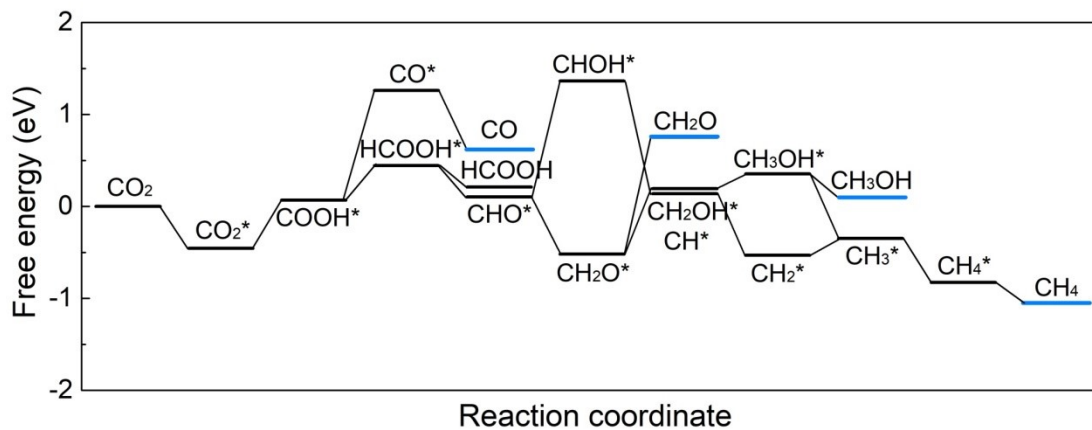

Fig. S5. Free energy diagrams of CO<sub>2</sub> reduction to yield C<sub>1</sub> products for Pt<sub>6</sub> clusters on Si(111)-(7×7) surface, respectively.

### S9. Kinetic process of reaction channels on Pd<sub>6</sub>@Si(111)-(7×7)

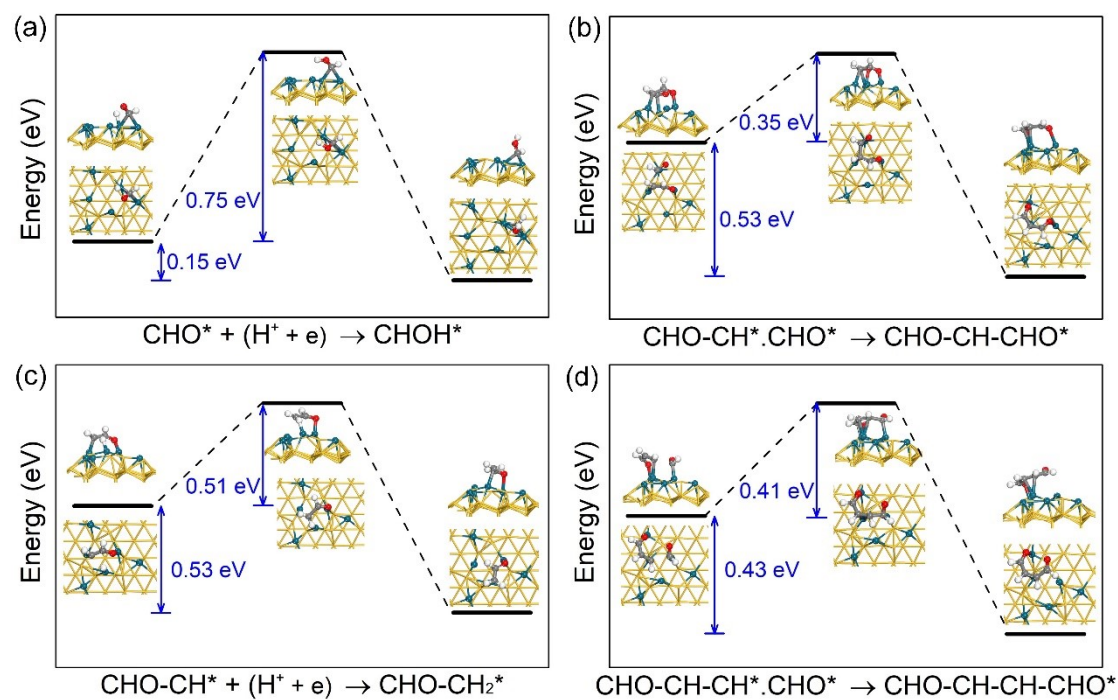

Fig. S6. Kinetic process of reaction channels toward C<sub>1</sub>, C<sub>2</sub>, C<sub>3</sub> and C<sub>4</sub> products on Pd<sub>6</sub>@Si(111)-(7×7), respectively. The insets display the side- and top-view structures of initial state (left), transition state (middle) and final state (right). The numbers indicate reaction heat (left) and kinetic barrier (middle). The Si, Pd, H, C and O atoms are shown in yellow, green, white, gray and red colors, respectively.

### S10. H<sub>2</sub>O decomposition on Pd<sub>6</sub>@Si(111)-(7×7) surface

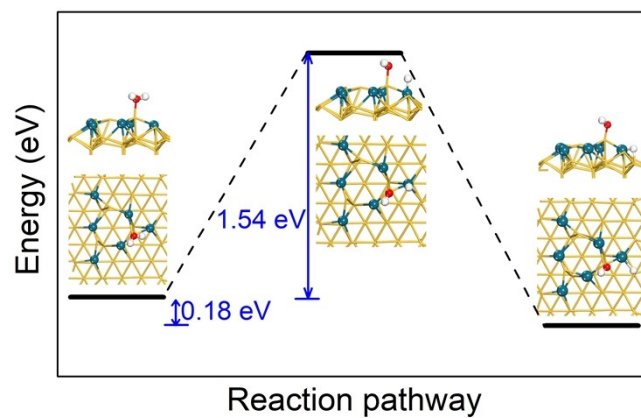

Fig. S7. The reaction pathway of H<sub>2</sub>O decomposition on Pd<sub>6</sub>@Si(111)-(7×7) surface.

### S11. Gibbs free energy of formation for C<sub>1</sub> products

Table S7. Gibbs free energy of formation ( $\Delta G$ ) for each elementary step of CO<sub>2</sub> reduction to C<sub>1</sub> products on Pd<sub>6</sub>@Si(111)-(7×7). Related to Fig. 5.

| Reaction                                      | $\Delta G$ (eV) |
|-----------------------------------------------|-----------------|
| CO <sub>2</sub> → CO <sub>2</sub> *           | -0.02           |
| CO <sub>2</sub> * + H → COOH*                 | 0.47            |
| COOH* + H* → CO* + H <sub>2</sub> O           | 0.16            |
| CO <sub>2</sub> * + H* → CHO.O*               | -0.01           |
| CHO.O + H* → CHO.OH*                          | -0.68           |
| CHO.OH* + H* → CHO* + H <sub>2</sub> O        | 0.42            |
| COOH* + H* → HCOOH*                           | -0.11           |
| CHO* + H* → CH <sub>2</sub> O*                | 1.02            |
| CHO* + H* → HCOH*                             | -0.05           |
| HCOH* + H* → CH <sub>2</sub> OH*              | -0.08           |
| CH <sub>2</sub> + H* → CH <sub>3</sub> *      | -0.34           |
| CH <sub>3</sub> + H* → CH <sub>4</sub> *      | -0.71           |
| CH <sub>2</sub> OH + H* → CH <sub>3</sub> OH* | -0.14           |



## S12. Gibbs free energy of formation for C<sub>2</sub> products

Table S8. Gibbs free energy of formation ( $\Delta G$ ) for each elementary step of CO<sub>2</sub> reduction to C<sub>2</sub> products on Pd<sub>6</sub>@Si(111)-(7×7). Related to Fig. 5.

| Reaction                                                                                  | $\Delta G$ (eV) |
|-------------------------------------------------------------------------------------------|-----------------|
| $2\text{CO}_2 \rightarrow \text{CO}_2.\text{CO}_2^*$                                      | -0.13           |
| $\text{CO}_2.\text{CO}_2^* + 2\text{H}^* \rightarrow \text{CHO.O-CHO.O}^*$                | -0.12           |
| $\text{CHO.O-CHO.O}^* + 2\text{H}^* \rightarrow \text{CHO.OH-CHO.OH}^*$                   | -0.55           |
| $\text{CHO.OH-CHO.OH}^* + 2\text{H}^* \rightarrow \text{CHO-CHO}^* + 2\text{H}_2\text{O}$ | 0.41            |
| $\text{CHO-CHO}^* + \text{H}^* \rightarrow \text{CHO-CHOH}^*$                             | -0.01           |
| $\text{CHO-CHOH}^* + \text{H}^* \rightarrow \text{CHO-CH}^* + \text{H}_2\text{O}$         | 0.26            |
| $\text{CHO-CH}^* + \text{H}^* \rightarrow \text{CHO-CH}_2^*$                              | -0.21           |
| $\text{CHO-CH}_2^* + \text{H}^* \rightarrow \text{CHO-CH}_3^*$                            | -0.35           |
| $\text{CHO-CH}_2^* + \text{H}^* \rightarrow \text{CHOH-CH}_2^*$                           | -0.20           |
| $\text{CHOH-CH}_2^* + \text{H}^* \rightarrow \text{CH-CH}_2^* + \text{H}_2\text{O}$       | 0.22            |
| $\text{CHO-CH}_3^* + \text{H}^* \rightarrow \text{CH}_2\text{O-CH}_3^*$                   | 0.56            |
| $\text{CH}_2\text{O-CH}_3^* + \text{H}^* \rightarrow \text{CH}_2\text{OH-CH}_3^*$         | -0.97           |
| $\text{CH-CH}_2^* + \text{H}^* \rightarrow \text{C}_2\text{H}_4^*$                        | -0.94           |

### S13. Gibbs free energy of formation for C<sub>3</sub> products

Table S9. Gibbs free energy of formation ( $\Delta G$ ) for each elementary step of CO<sub>2</sub> reduction to C<sub>3</sub> products on Pd<sub>6</sub>@Si(111)-(7×7). Related to Fig. S4.

| Reaction                                                                                             | $\Delta G$ (eV) |
|------------------------------------------------------------------------------------------------------|-----------------|
| CHO-CH* + CHO* → CHO-CH-CHO*                                                                         | -0.16           |
| CHO-CH-CHO* + H* → CHO-CH-CHOH*                                                                      | 0.45            |
| CHO-CH-CHOH* + H* → CHO-CH-CH* + H <sub>2</sub> O                                                    | 0.10            |
| CHO-CH-CH* + H* → CHO-CH-CH <sub>2</sub> *                                                           | -0.94           |
| CHO-CH-CH <sub>2</sub> * + H* → CHOH-CH-CH <sub>2</sub> *                                            | 0.23            |
| CHOH-CH-CH <sub>2</sub> * + H* → CHOH-CH <sub>2</sub> -CH <sub>2</sub> *                             | 0.46            |
| CHOH-CH-CH <sub>2</sub> * + H* → CH-CH-CH <sub>2</sub> * + H <sub>2</sub> O                          | -0.28           |
| CHOH-CH <sub>2</sub> -CH <sub>2</sub> * + H* → CHOH-CH <sub>2</sub> -CH <sub>3</sub> *               | -0.91           |
| CH-CH-CH <sub>2</sub> * + H* → CH <sub>2</sub> -CH-CH <sub>2</sub> *                                 | -0.83           |
| CHOH-CH <sub>2</sub> -CH <sub>3</sub> * + H* → CH <sub>2</sub> OH-CH <sub>2</sub> -CH <sub>3</sub> * | -0.50           |
| CH <sub>2</sub> -CH-CH <sub>2</sub> * + H* → CH <sub>2</sub> -CH-CH <sub>3</sub> *                   | -0.26           |

### S14. Gibbs free energy of formation for C<sub>4</sub> products

Table S10. Gibbs free energy of formation ( $\Delta G$ ) for each elementary step of CO<sub>2</sub> reduction to C<sub>4</sub> products on Pd<sub>6</sub>@Si(111)-(7×7). Related to Fig. S4.

| Reaction                                                                                                                               | $\Delta G$ (eV) |
|----------------------------------------------------------------------------------------------------------------------------------------|-----------------|
| CHO-CH-CH* + CHO* → CHO-CH-CH-CHO*                                                                                                     | -0.27           |
| CHO-CH-CH-CHO* + H* → CHO-CH-CH-CHOH*                                                                                                  | 0.31            |
| CHO-CH-CH-CHOH* + H* → CHO-CH-CH-CH* + H <sub>2</sub> O                                                                                | 0.38            |
| CHO-CH-CH-CH* + H* → CHO-CH-CH-CH <sub>2</sub> *                                                                                       | -1.35           |
| CHO-CH-CH-CH <sub>2</sub> * + H* → CHO-CH-CH-CH <sub>2</sub> OH*                                                                       | -0.26           |
| CHO-CH-CH-CH <sub>2</sub> OH* + H* → CHO-CH-CH-CH <sub>2</sub> * + H <sub>2</sub> O                                                    | 0.16            |
| CHO-CH-CH-CH <sub>2</sub> * + H* → CHO-CH-CH-CH <sub>3</sub> *                                                                         | 0.10            |
| CHO-CH-CH-CH <sub>3</sub> * + H* → CH <sub>2</sub> OH-CH-CH-CH <sub>3</sub> *                                                          | -0.26           |
| CH <sub>2</sub> OH-CH-CH-CH <sub>3</sub> * + H* → CH <sub>2</sub> OH-CH-CH <sub>2</sub> -CH <sub>3</sub> *                             | 0.46            |
| CH <sub>2</sub> OH-CH-CH <sub>2</sub> -CH <sub>3</sub> * + H* → CH <sub>2</sub> OH-CH <sub>2</sub> -CH <sub>2</sub> -CH <sub>3</sub> * | -0.97           |
